# Supplementary material for: Synthesis and degradation of branched, photo-labile poly(acrylic acid) and polystyrene
Source: Royal Society of Chemistry journal article supplement (doi:10.1039/c8py01597j), 2018-12-21
Supplement: c8py01597j1.pdf [file c8py01597j1.pdf]

## Supporting Information

### Synthesis and degradation of branched, photo-labile poly (acrylic acid) and polystyrene

O. Eckardt,<sup>a,b</sup> S. Seupel,<sup>a,b</sup> G. Festag,<sup>a,b</sup> M. Gottschaldt<sup>a,b</sup> and F. H. Schacher<sup>a,b\*</sup>

<sup>a</sup>Institute of Organic Chemistry and Macromolecular Chemistry (IOMC), Friedrich Schiller University Jena,  
Lessingstraße 8, D-07443 Jena, Germany  
[felix.schacher@uni-jena.de](mailto:felix.schacher@uni-jena.de)

<sup>b</sup>Jena Center for Soft Matter (JCSM), Friedrich Schiller University Jena, Philosophenweg 7, D-07743 Jena, Germany

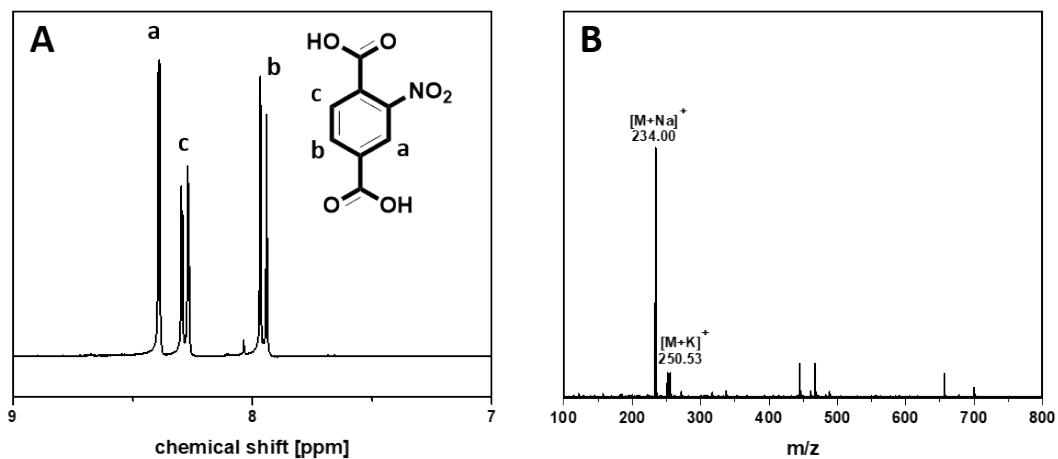

Figure S1:  $^1\text{H}$ -NMR spectrum in DMSO- $d_6$  (A) and ESI mass spectrum (B) of nitroterephthalic acid (NTA).

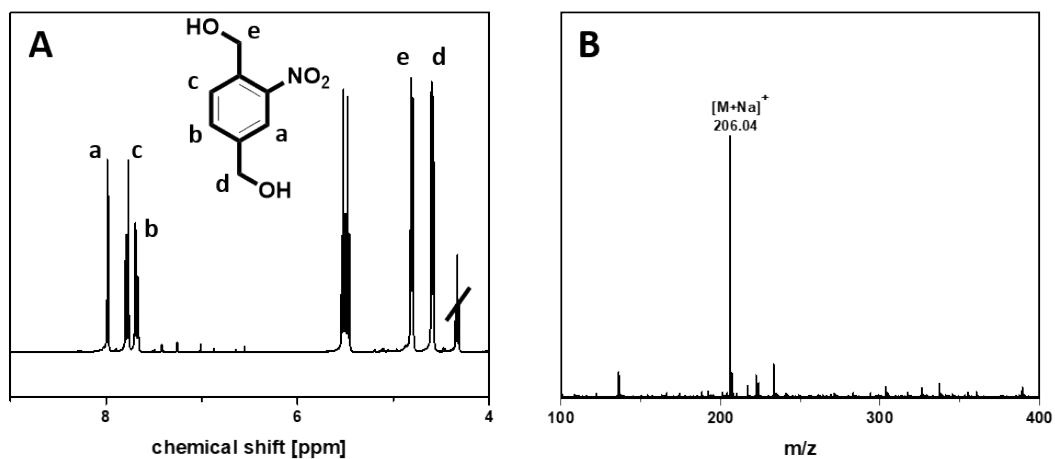

Figure S2:  $^1\text{H}$ -NMR spectrum in DMSO- $d_6$  (A) and ESI mass spectrum (B) of (2-nitro-1,4-phenylene)dimethanol (NPDM).

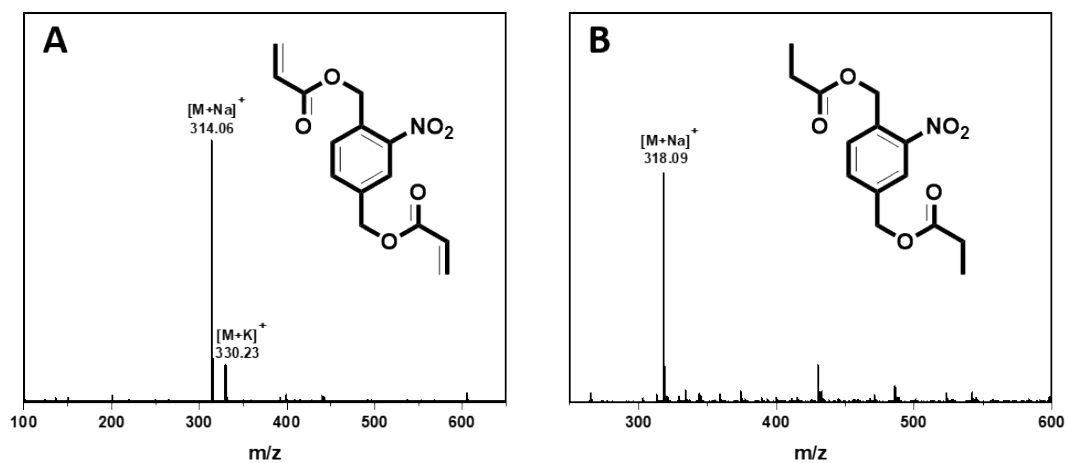

Figure S3: ESI mass spectra of (2-nitro-1,4-phenylene)bis(methylene) diacrylate (NPMDA) (A) and (2-nitro-1,4-phenylene)bis(methylene) dipropionate (NPMDP).

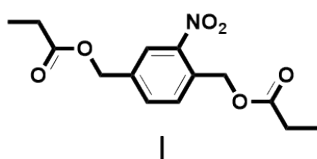

positive mode

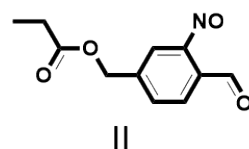

negative mode

30 min

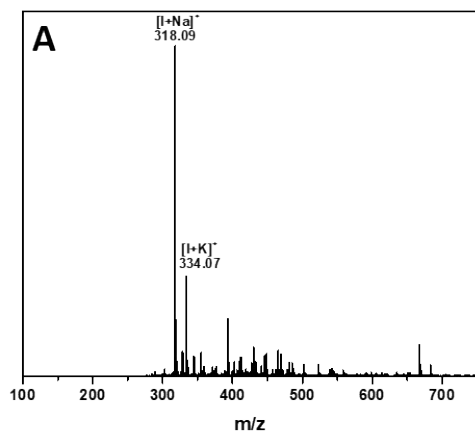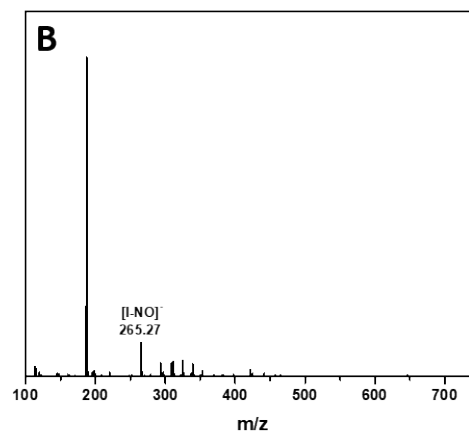

300 min

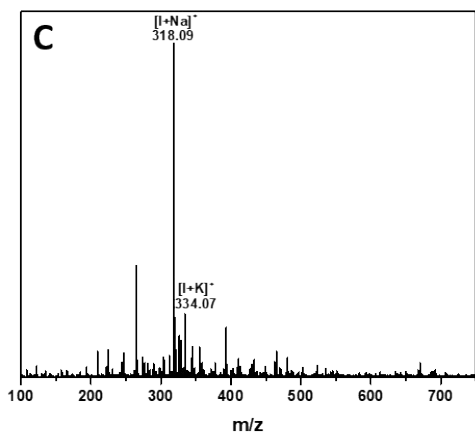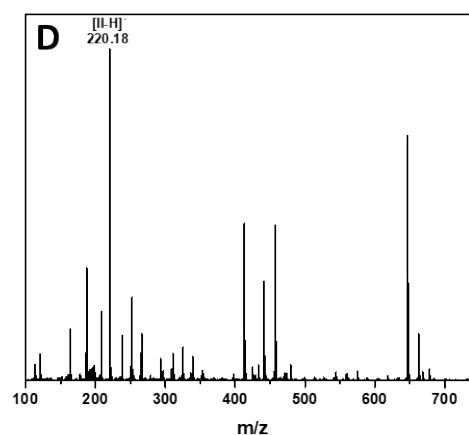

600 min

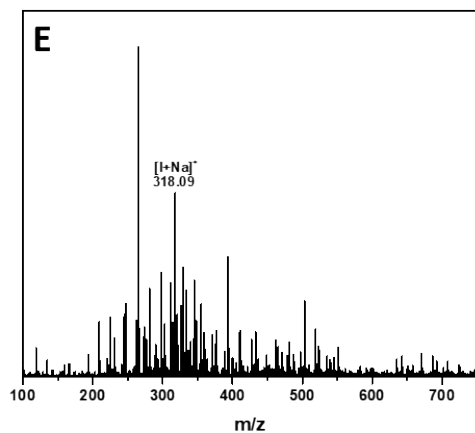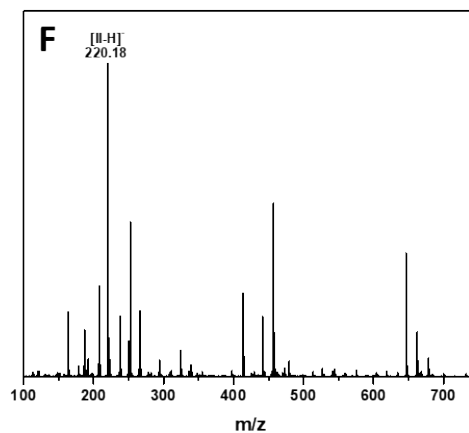

Figure S4: Positive mode ESI-MS data of NPMDP after 30 min (A), 300 min (C) and 600 min (E) of UV irradiation compared to negative mode ESI-MS spectra of NPMDP after 30 min (B), 300 min (D) and 600 min (F) of UV irradiation.

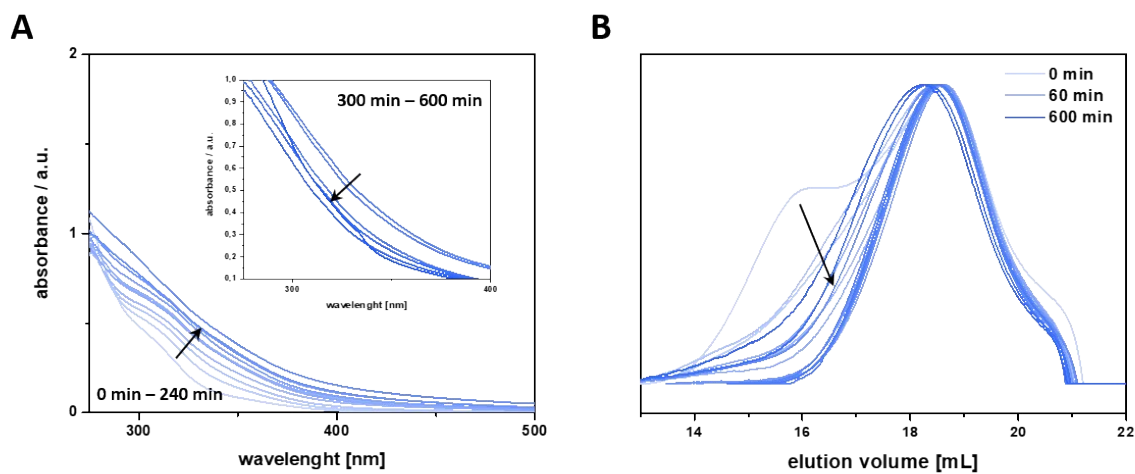

Figure S5: Change of UV-vis spectra (A) and SEC elution traces (B) of branched d-PAA1 during UV degradation in THF.

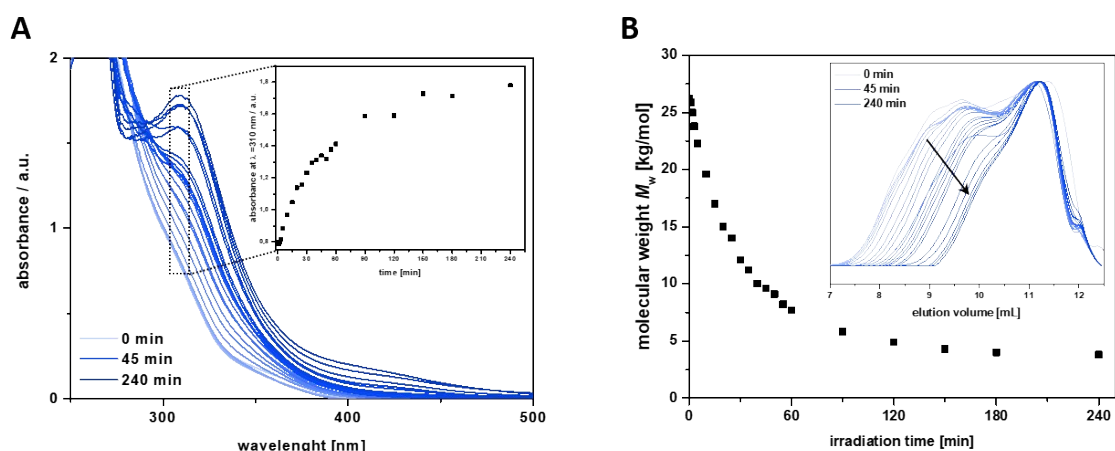

Figure S6: Change in the UV-vis spectra (A) and SEC elution traces (B) of branched d-PS2 with 4% photodegradable crosslinker during UV degradation.

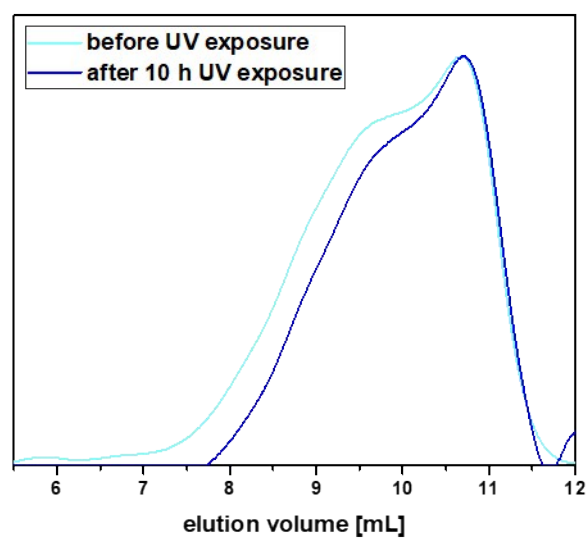

Figure S7: SEC traces of branched non-degradable PS3 before and after UV exposure.
